# Supplementary material
Source: publisher site journal article supplement (https://www.dovepress.com/article/588181)
Supplement: Supplementary file 1 [file 588181%20Supplementary%20Material.docx]

**Supplementary Material**

Table S1 Search strategy and results for Cochrane Library (2025-2-2 13:00)

| Search | Query | Items found |
| --- | --- | --- |
| #1 | MeSH descriptor: [Gynecology] explode all trees | 275 |
| #2 | (gynaecolog* OR gynecolog* OR endometri* OR cervi* OR ocer* OR vagina*):ti,ab,kw (Word variations have been searched) | 76862 |
| #3 | #1 OR #2 | 76862 |
| #4 | MeSH descriptor: [Neoplasms] explode all trees | 128820 |
| #5 | (tumor* OR tumour* OR cancer* OR malignan* OR neoplas*):ti,ab,kw (Word variations have been searched) | 283724 |
| #6 | #4 OR #5 | 296958 |
| #7 | #3 AND #6 | 17799 |
| #8 | MeSH descriptor: [Lymphedema] explode all trees | 967 |
| #9 | MeSH descriptor: [Edema] explode all trees | 2449 |
| #10 | (lymphoedem* OR lymphodem* OR lymph*tic OR lymphedema* OR swelling* OR edema* OR oedema*):ti,ab,kw (Word variations have been searched) | 48031 |
| #11 | #8 OR #9 OR #10 | 48080 |
| #12 | MeSH descriptor: [Lower Extremity] explode all trees | 10380 |
| #13 | MeSH descriptor: [Leg] explode all trees | 3709 |
| #14 | ((lower limb*) OR (membrum inferius) OR leg* OR (lower extremit*)):ti,ab,kw (Word variations have been searched) | 70921 |
| #15 | #12 OR #13 OR #14 | 74495 |
| #16 | #11 AND #15 | 3578 |
| #17 | MeSH descriptor: [Exercise] explode all trees | 40288 |
| #18 | (exercis* OR (physical activit*) OR movement* OR (physical therap*) OR physiotherap* OR (strength train*) OR (resistance train*) OR (aerobic fitness*) OR (weight train*) OR (stretching exercis*) OR kinesiotherap* OR (Water Sport*)):ti,ab,kw (Word variations have been searched) | 282852 |
| #19 | #17 OR #18 | 285027 |
| #20 | #7 AND #16 AND #19 | 38 |

Table S2 Search strategy and results for PUBMED (2025-2-2 15:29)

| Search | Query | Items found |
| --- | --- | --- |
| #1 | "Gynecology"[Mesh] | 21430 |
| #2 | gynaecolog*[Title/Abstract] OR gynecolog*[Title/Abstract] OR endometri*[Title/Abstract] OR cervi*[Title/Abstract] OR ocer*[Title/Abstract] OR vagina*[Title/Abstract] | 641120 |
| #3 | #1 OR #2 | 645861 |
| #4 | "Neoplasms"[Mesh] | 4067761 |
| #5 | tumor*[Title/Abstract] OR tumour*[Title/Abstract] OR cancer*[Title/Abstract] OR malignan*[Title/Abstract] OR neoplas*[Title/Abstract] | 4151787 |
| #6 | #4 OR #5 | 5393608 |
| #7 | #3 AND #6 | 258292 |
| #8 | (("Lymphedema"[Mesh])) OR "Edema"[Mesh] | 61833 |
| #9 | lymphoedem*[Title/Abstract] OR lymphodem*[Title/Abstract] OR lymph*tic[Title/Abstract] OR lymphedema*[Title/Abstract] OR swelling*[Title/Abstract] OR edema*[Title/Abstract] OR oedema*[Title/Abstract] | 472588 |
| #10 | #8 OR #9 | 492224 |
| #11 | ("Lower Extremity"[Mesh]) OR "Leg"[Mesh] | 193925 |
| #12 | "lower limb*"[Title/Abstract] OR "membrum inferius"[Title/Abstract] OR leg[Title/Abstract] OR legs[Title/Abstract] OR "lower extremit*"[Title/Abstract] | 268597 |
| #13 | #11 OR #12 | 390857 |
| #14 | #10 AND #13 | 21715 |
| #15 | "Exercise"[Mesh] | 267027 |
| #16 | exercis*[Title/Abstract] OR (physical activit*[Title/Abstract]) OR movement*[Title/Abstract] OR (physical therap*[Title/Abstract]) OR physiotherap*[Title/Abstract] OR (strength train*[Title/Abstract]) OR (resistance train*[Title/Abstract]) OR (aerobic fitness*[Title/Abstract]) OR (weight train*[Title/Abstract]) OR (stretching exercis*[Title/Abstract]) OR kinesiotherap*[Title/Abstract] OR (Water Sport*[Title/Abstract]) | 980722 |
| #17 | #15 OR #16 | 1061643 |
| #18 | #7 AND #14 AND #17 | 44 |

Table S3 Search strategy and results for WEB OF SCIENCE (2025-2-2 18:15)

| Search | Query | Items found |
| --- | --- | --- |
| #1 | TS=(gynaecolog* OR gynecolog* OR endometri* OR cervi* OR ocer* OR vagina* ) | [476,507](https://lib-proxy.wmu.edu.cn/https/vpn/17/P7TXE55GPNSXT3LPMNTT6Z5MMF3GT7UBPSTT6Z5P/wos/woscc/summary/efe8efe6-8a96-4104-93dc-5cd9169cbf10-0146cdd151/relevance/1) |
| #2 | TS=(tumor* OR tumour* OR cancer* OR malignan* OR neoplas*) | [3,988,389](https://lib-proxy.wmu.edu.cn/https/vpn/17/P7TXE55GPNSXT3LPMNTT6Z5MMF3GT7UBPSTT6Z5P/wos/woscc/summary/e623adbd-37ef-465e-b16a-3e6d025a2c8d-0146cde1ce/relevance/1) |
| #3 | #1 AND #2 | [193,875](https://lib-proxy.wmu.edu.cn/https/vpn/17/P7TXE55GPNSXT3LPMNTT6Z5MMF3GT7UBPSTT6Z5P/wos/woscc/summary/b43ab225-6c60-43f3-b685-0c08ebaa92e1-0146cddb28/relevance/1) |
| #4 | TS=("lower limb*" OR "membrum inferius" OR leg* OR "lower extremit*") | [498,877](https://lib-proxy.wmu.edu.cn/https/vpn/17/P7TXE55GPNSXT3LPMNTT6Z5MMF3GT7UBPSTT6Z5P/wos/woscc/summary/eb1f7ca8-1a1d-4737-b633-f160b6189f7f-0146cdeab4/relevance/1) |
| #5 | TS=(lymphoedem* OR lymphodem* OR lymph*tic OR lymphedema* OR swelling* OR edema* OR oedema*) | [412,728](https://lib-proxy.wmu.edu.cn/https/vpn/17/P7TXE55GPNSXT3LPMNTT6Z5MMF3GT7UBPSTT6Z5P/wos/woscc/summary/93b5511d-8673-4fc9-b725-a98b4d8af34d-0146cdefcb/relevance/1) |
| #6 | #4 AND #5 | [11,135](https://lib-proxy.wmu.edu.cn/https/vpn/17/P7TXE55GPNSXT3LPMNTT6Z5MMF3GT7UBPSTT6Z5P/wos/woscc/summary/99aae264-fb73-453e-97e9-26832dc28120-0146cdfc88/relevance/1) |
| #7 | TS=(exercis* OR (physical activit*) OR movement* OR (physical therap*) OR physiotherap* OR (strength train*) OR (resistance train*) OR (aerobic fitness*) OR (weight train*) OR (stretching exercis*) OR kinesiotherap* OR (Water Sport*)) | [1,324,191](https://lib-proxy.wmu.edu.cn/https/vpn/17/P7TXE55GPNSXT3LPMNTT6Z5MMF3GT7UBPSTT6Z5P/wos/woscc/summary/c32f01e0-be8f-4e84-9c73-4ea0be35bb52-0146ce028d/relevance/1) |
| #8 | #7 AND #6 AND #3 | 75 |

Table S4 Search strategy and results for Embase (2025-2-2 20:50)

| Search | Query | Items found |
| --- | --- | --- |
| #1 | ('gynecology'/exp OR 'gynecology') AND [embase]/lim | 617489 |
| #2 | ('gynaecology':ti,ab,kw OR 'gynecologic residency system':ti,ab,kw OR 'gynecologic training':ti,ab,kw OR 'gynecology':ti,ab,kw) AND [embase]/lim | 60532 |
| #3 | #1 OR #2 | 625935 |
| #4 | 'neoplasm'/exp AND [embase]/lim | 5402838 |
| #5 | ('acral tumor':ti,ab,kw OR 'acral tumour':ti,ab,kw OR 'neoplasia':ti,ab,kw OR 'neoplasms':ti,ab,kw OR 'neoplastic disease':ti,ab,kw OR 'neoplastic entity':ti,ab,kw OR 'neoplastic mass':ti,ab,kw OR 'tumor':ti,ab,kw OR 'tumoral entity':ti,ab,kw OR 'tumoral mass':ti,ab,kw OR 'tumorous entity':ti,ab,kw OR 'tumorous mass':ti,ab,kw OR 'tumors':ti,ab,kw OR 'tumour':ti,ab,kw OR 'tumoural entity':ti,ab,kw OR 'tumoural mass':ti,ab,kw OR 'tumourous entity':ti,ab,kw OR 'tumourous mass':ti,ab,kw OR 'tumours':ti,ab,kw OR 'neoplasm':ti,ab,kw) AND [embase]/lim | 2821105 |
| #6 | #4 OR #5 | 5892418 |
| #7 | #3 AND #6 | 179498 |
| #8 | ('lower limb'/exp OR 'lower limb') AND [embase]/lim | 478198 |
| #9 | ('leg'/exp OR 'leg') AND [embase]/lim | 493468 |
| #10 | ('lower extremity':ti,ab,kw OR 'lower limb':ti,ab,kw OR 'leg skeleton':ti,ab,kw OR 'leg':ti,ab,kw) AND [embase]/lim | 226814 |
| #11 | #8 OR #9 OR #10 | 645041 |
| #12 | 'lymphedema'/exp AND [embase]/lim | 39254 |
| #13 | ('lymph edema':ti,ab,kw OR 'lymph oedema':ti,ab,kw OR 'lymphatic edema':ti,ab,kw OR 'lymphatic oedema':ti,ab,kw OR 'lymphedemas':ti,ab,kw OR 'lymphoedema':ti,ab,kw OR 'lymphoedemas':ti,ab,kw OR 'lymphooedema':ti,ab,kw OR 'lymphostatic edema':ti,ab,kw OR 'lymphostatic oedema':ti,ab,kw OR 'posttraumatic lymphedema':ti,ab,kw OR 'posttraumatic lymphoedema':ti,ab,kw OR 'lymphedema':ti,ab,kw) AND [embase]/lim | 16965 |
| #14 | #12 OR #13 | 41204 |
| #15 | #11 AND #14 | 5681 |
| #16 | ('exercise'/exp OR 'exercise') AND [embase]/lim | 587748 |
| #17 | ('biometric exercise':ti,ab,kw OR 'effort':ti,ab,kw OR 'exercise capacity':ti,ab,kw OR 'exercise performance':ti,ab,kw OR 'exercise training':ti,ab,kw OR 'exertion':ti,ab,kw OR 'fitness training':ti,ab,kw OR 'fitness workout':ti,ab,kw OR 'physical conditioning, human':ti,ab,kw OR 'physical effort':ti,ab,kw OR 'physical exercise':ti,ab,kw OR 'physical exertion':ti,ab,kw OR 'physical work-out':ti,ab,kw OR 'physical workout':ti,ab,kw OR 'exercise':ti,ab,kw) AND [embase]/lim | 55796 |
| #18 | #16 OR #17 | 751272 |
| #19 | #7 AND #15 AND #18 | 10 |

Table S5 Search strategy and results for Ovid (2025-2-2 21:50)

| Search | Query | Items found |
| --- | --- | --- |
| 1 | (gynaecolog$ or gynecolog$ or endometri$ or cervi$ or ocer$ or vagina$).ab,kf,ti. | 1023928 |
| 2 | (tumor$ or tumour$ or cancer$ or malignan$ or neoplas$).ab,kf,ti. | 6639740 |
| 3 | ("lower limb$" or "membrum inferius" or leg$ or "lower extremit$").ab,kf,ti. | 885082 |
| 4 | (lymphoedem$ or lymphodem$ or lymph$tic or lymphedema$ or swelling$ or edema$ or oedema$).ab,kf,ti. | 433324 |
| 5 | (exercis$ or "physical activit$" or movement$ or "physical therap$" or physiotherap$ or "strength train$" or "resistance train$" or "aerobic fitness$" or "weight train$" or "stretching exercis$" or kinesiotherap$ or "Water Sport$").ab,kf,ti. | 1582222 |
| 6 | 1 and 2 and 3 and 4 and 5 | 70 |

Table S6 Search strategy and results for CINAHL (2024-2-2 22:55)

| Search | Query | Items found |
| --- | --- | --- |
| #1 | MH gynecology OR AB (gynaecolog* OR gynecolog* OR endometri* OR cervi* OR ocer* OR vagina*) OR TI (gynaecolog* OR gynecolog* OR endometri* OR cervi* OR ocer* OR vagina*) | 141,261 |
| #2 | MH neoplasms OR AB (tumor* OR tumour* OR cancer* OR malignan* OR neoplas*) OR TI (tumor* OR tumour* OR cancer* OR malignan* OR neoplas*) | 723,554 |
| #3 | MH lymphedema OR AB (lymphoedem* OR lymphodem* OR lymph*tic OR lymphedema* OR swelling* OR edema* OR oedema*) OR TI (lymphoedem* OR lymphodem* OR lymph*tic OR lymphedema* OR swelling* OR edema* OR oedema*) | 62,271 |
| #4 | MH "lower extremity" OR MH leg OR AB ("lower limb*" OR "membrum inferius" OR leg* OR "lower extremit*") OR TI ("lower limb*" OR "membrum inferius" OR leg* OR "lower extremit*") | 175,645 |
| #5 | MH exercise OR TI (exercis* OR (physical activit*) OR movement* OR (physical therap*) OR physiotherap* OR (strength train*) OR (resistance train*) OR (aerobic fitness*) OR (weight train*) OR (stretching exercis*) OR kinesiotherap* OR (Water Sport*)) OR AB (exercis* OR (physical activit*) OR movement* OR (physical therap*) OR physiotherap* OR (strength train*) OR (resistance train*) OR (aerobic fitness*) OR (weight train*) OR (stretching exercis*) OR kinesiotherap* OR (Water Sport*)) | 349,784 |
| #6 | #1 AND #2 AND #3 AND #4 AND #5 | 16 |

Table S7 Quality evaluation results of systematic reviews (n = 2)

| **The JBI Critical Appraisal Checklist for Systematic Reviews and Research Syntheses** | **Hsu et al.[36]** | | **Stout et al.[37]** | |
| --- | --- | --- | --- | --- |
| Is the review question clearly and explicitly stated? | Yes | Yes | Yes | Yes |
| Were the inclusion criteria appropriate for the review question? | Yes | Yes | Yes | Yes |
| Was the search strategy appropriate? | Yes | Yes | Yes | Yes |
| Were the sources and resources used to search for studies adequate? | Yes | Yes | Yes | Yes |
| Were the criteria for appraising studies appropriate? | Yes | Yes | Yes | Yes |
| Was critical appraisal conducted by two or more reviewers independently? | Yes | Yes | Yes | Yes |
| Were there methods to minimize errors in data extraction? | Yes | Yes | Yes | Yes |
| Were the methods used to combine studies appropriate? | Yes | Yes | Yes | Yes |
| Was the likelihood of publication bias assessed? | Not applicable | Not applicable | Not applicable | Not applicable |
| Were recommendations for policy and/or practice supported by the reported data? | Yes | Yes | Yes | Yes |
| Were the specific directives for new research appropriate? | Yes | Yes | Yes | Yes |
| Overall appraisal | Include | | Include | |

Table S8 Quality evaluation results of expert consensus (n = 3)

| **The JBI Critical Appraisal Checklist for Textual Evidence** | **the NLN Medical Advisory Committee[23]** | | **The international society of lymphology[10]** | | **Hayes et al.[24]** | |
| --- | --- | --- | --- | --- | --- | --- |
| Evaluator 1 | Evaluator 2 | Evaluator 1 | Evaluator 2 | Evaluator 1 | Evaluator 2 |
| Are the sources of the ideas clearly marked? | Yes | Yes | Yes | Yes | Yes | Yes |
| Does the opinion come from an influential expert in the field? | Yes | Yes | Yes | Yes | Yes | Yes |
| Whether the point of view presented is centered on the  relevant population interests of the study? | Yes | Yes | Yes | Yes | Yes | Yes |
| Are the stated conclusions based on the analysis? Are ideas expressed logically? | Yes | Yes | Yes | Yes | Yes | Yes |
| Was there any reference to other literature? | Yes | Yes | Yes | Yes | Yes | Yes |
| Are there any inconsistencies between the ideas presented and the previous literature? | Unclear | Unclear | Yes | Yes | Yes | Yes |
| Overall appraisal | Include | | Include | | Include | |

**
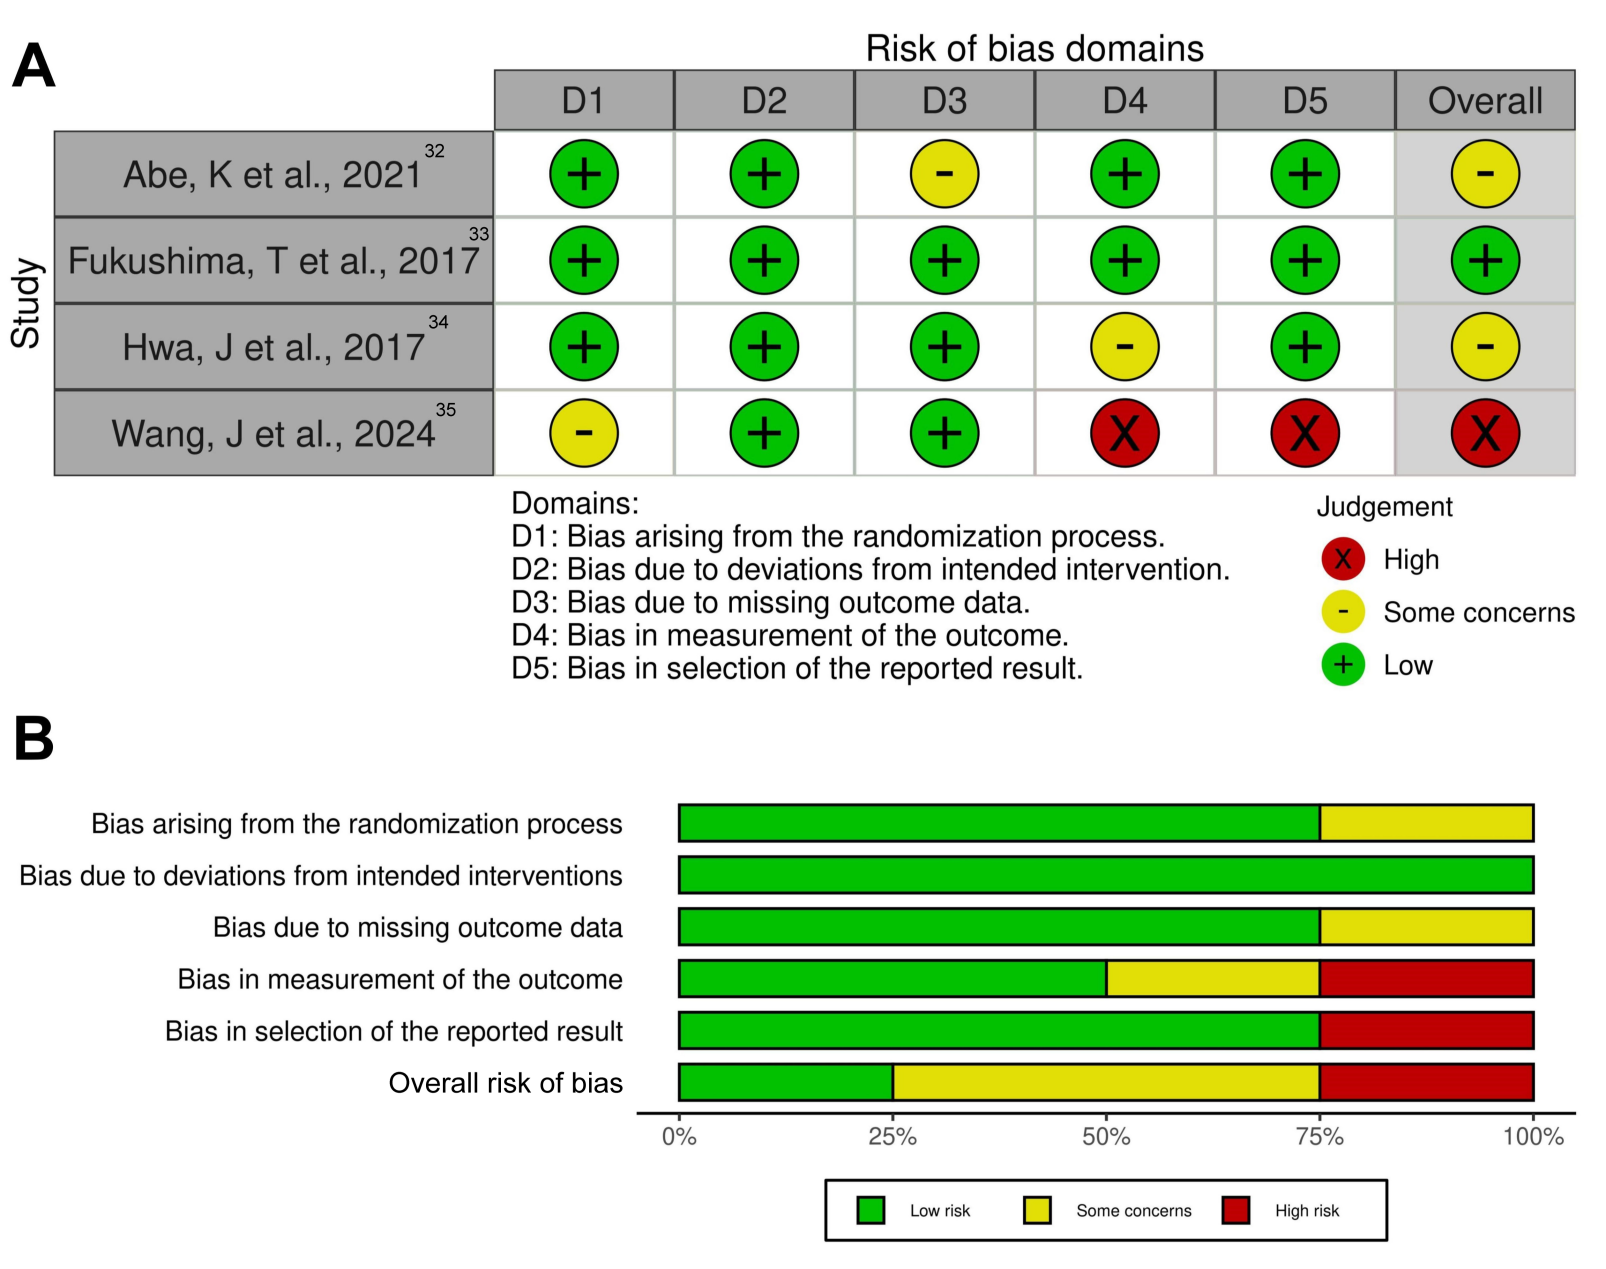
**

Supplementary Figure S1. Risk of bias assessment for the included randomized controlled trials (RCTs).

(A) Risk of bias summary: judgments about each risk of bias domain for each included study. (B) Risk of bias graph: review authors' judgments about each risk of bias domain presented as percentages across all included studies.
